# Supplementary material
Source: publisher figshare collection journal article supplement (https://acs.figshare.com/ndownloader/files/4378264)

## **Supporting Information**

### **Photocatalytic Events of CdSe Quantum Dots in Confined Media. Electrode Behavior of Coupled Platinum Nanoparticles**

Clifton Harris and Prashant V. Kamat\*

Radiation Laboratory and Department of Chemistry and Biochemistry  
University of Notre Dame, Notre Dame, IN 46556

SI-1

### Poisson analysis of the ionic and particulate contents of the micelles before and after intermicellar exchange.

The expected probabilities of a micelle containing a given species are shown below in figures SI-1 (A-C).  $P(\bar{n})$  defines the probability of a micelle containing  $\bar{n}$  species. Figures A and B show the distribution of the precursor ions of CdSe and Pt, respectively. Figure C shows the distribution of particles following the formation of CdSe and Pt nanoparticles after micellar mixing. The probability of a micelle containing one CdSe particle,  $P_{\text{CdSe}}(1)$ , and one Pt particle,  $P_{\text{Pt}}(1)$ , are approximated to .03 and .01, respectively. Based on the Poisson analysis, if the micelle concentration is held constant, the expected probability of a micelle containing both a CdSe and Pt particle,  $P_{\text{CdSe/Pt}}(1)$ , is defined as the product shown below:

$$P_{\text{CdSe/Pt}}(1) = P_{\text{CdSe}}(1) \times P_{\text{Pt}}(1) = .0003$$

However, because electron transfer is clearly observed between CdSe and Pt, we conclude that the coupling of the particles is spontaneous, and thus, particle distributions, unlike ion distributions, can not be predicted using mathematical modeling due to such external factors as electrostatic interaction, thermodynamic stability, etc..

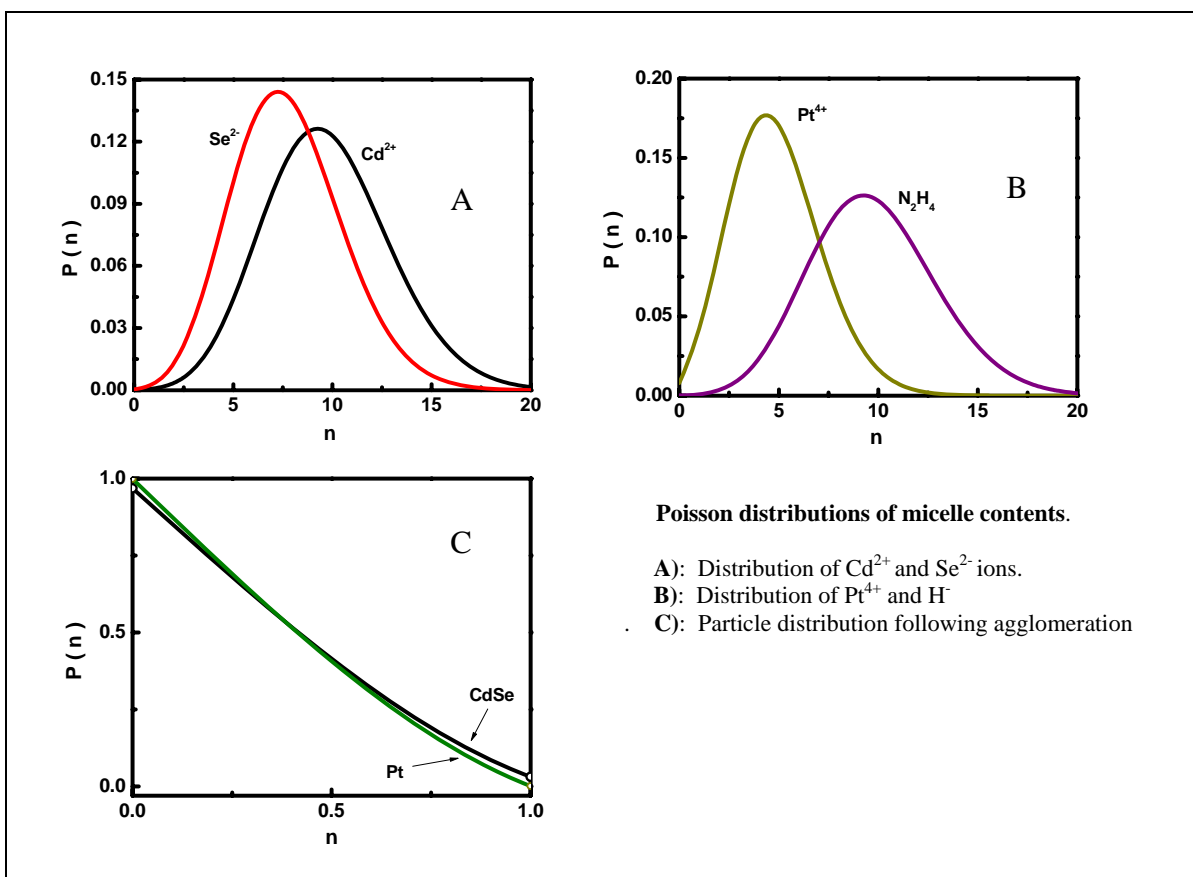

SI-2

**Distribution of  $MV^{2+}$  ions across the micellar medium.**

The following shows the Poisson distribution of  $MV^{2+}$  molecules across the micellar medium. The concentration of  $MV^{2+}$  is 1mM and the water to surfactant ratio,  $w_o$ , is 16.5. As shown,  $[MV^{2+}] \gg [CdSe]$ ,  $[Pt]$  and every micelle contains a  $MV^{2+}$  molecule.

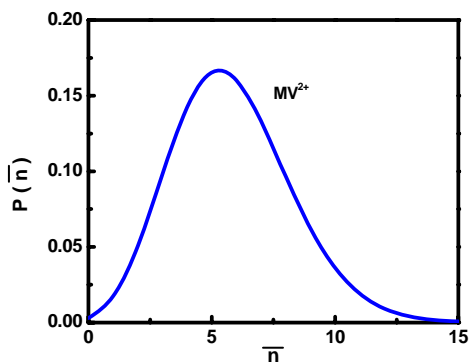

SI-3

**Transient absorption-time profiles of a micellar solution containing CdSe and various concentrations of  $MV^{2+}$ .**

The maximum concentration of the reduced radical species,  $MV^{+\bullet}$ , obtained following laser excitation of CdSe/ $MV^{2+}$ , is independent of the starting concentration of  $MV^{2+}$  at values beyond the  $\mu M$  range. This indicates surface saturation of CdSe by  $MV^{2+}$ . At the time scale displayed in the figure, only  $MV^{2+}$  ions at the CdSe surface can be reduced, since diffusion of unbound  $MV^{2+}$  to the surface occurs on a much slower timescale. Increasing the laser power also showed no real change in the  $MV^{+\bullet}$  yield.

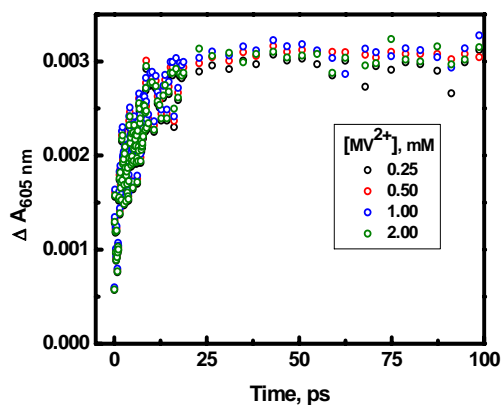

SI-4

**Absorbance spectra of the  $MV^{+\bullet}$  radical.**

The spectra features of a solution containing the  $MV^{+\bullet}$  radical are shown below. The strong, broad absorbance in the 600 nm region makes  $MV^{+\bullet}$  an ideal probe molecule.

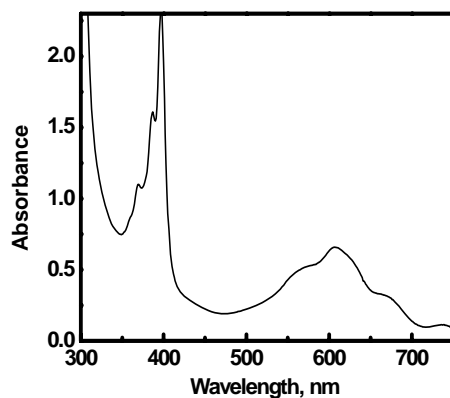

SI-5

**Transient absorption spectra of  $CdSe/MV^{2+}$  at various probe delay times.**

Using femtosecond transient absorption, the transient absorption spectra of  $CdSe$  in the presence of  $MV^{2+}$  was obtained. The concentration of  $MV^{2+}$  was 1mM. As shown in SI-3, the  $CdSe$  surface is saturated by  $MV^{2+}$ . At a delay time of  $t=0$  ps, no characteristic absorbance of the  $MV^{+\bullet}$  radical is observed. At longer times, the broad absorption in the 600 nm range following excitation of the  $CdSe$  confirms the formation of the  $MV^{+\bullet}$  radical.

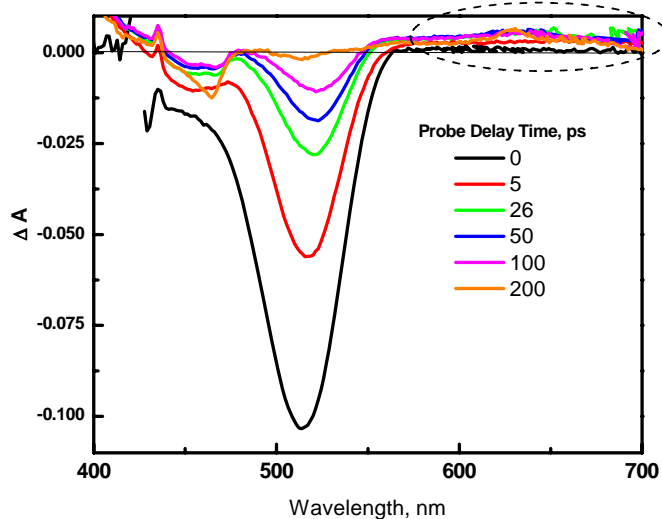

Supplement: Supplementary file 1 [file 4378264]
